# Supplementary material
Source: PubMed Central journal article supplement (PMC7286803)
Supplement: NIHMS1568720-supplement-1.pdf [file NIHMS1568720-supplement-1.pdf]

## Memantine Effects on Electroencephalographic Measures of Putative Excitatory/Inhibitory Balance in Schizophrenia

### *Supplemental Information*

**Supplemental Table S1.** Association between spectral parameters, clinical and demographic measures during PBO condition. Note: these differences do not survive Bonferroni correction for multiple comparisons.

|                           | Aperiodic<br>slope | Theta<br>Power | Alpha<br>Power | Beta<br>Power | Gamma<br>Power |
|---------------------------|--------------------|----------------|----------------|---------------|----------------|
|                           | <i>r</i>           | <i>r</i>       | <i>r</i>       | <i>r</i>      | <i>r</i>       |
| Age                       | 0.09               | 0.23           | 0.03           | 0.22          | 0.19           |
| Age of onset              | 0.12               | -0.20          | -0.41*         | -0.29         | 0.27           |
| Duration of Illness       | 0.04               | 0.37*          | 0.32           | 0.37*         | -0.01          |
| GAF                       | 0.04               | 0.08           | -0.02          | -0.06         | 0.12           |
| WRAT                      | -0.30              | 0.30           | 0.39           | 0.32          | 0.45           |
| PANSS Positive            | 0.02               | -0.01          | 0.08           | 0.40*         | -0.13          |
| PANSS Negative            | -0.03              | -0.17          | -0.12          | -0.11         | -0.14          |
| PANSS General             | -0.14              | -0.11          | 0.16           | 0.22          | -0.20          |
| PANSS Total               | -0.08              | -0.13          | 0.07           | 0.21          | -0.20          |
| CPZ equivalents           | -0.14              | -0.07          | 0.15           | 0.07          | -0.03          |
| Speed of Processing       | 0.10               | 0.11           | 0.33           | 0.13          | -0.06          |
| Attention/Vigilance       | 0.04               | 0.08           | -0.09          | 0.24          | -0.05          |
| Working Memory            | -0.03              | 0.02           | 0.15           | 0.19          | -0.11          |
| Verbal Learning           | -0.14              | -0.17          | 0.14           | 0.05          | -0.09          |
| Visual Learning           | -0.25              | -0.09          | 0.23           | -0.01         | 0.14           |
| Reasoning & Prob. Solving | -0.29              | -0.16          | 0.24           | 0.06          | -0.01          |
| Social Cognition          | 0.02               | 0.18           | -0.11          | 0.15          | 0.08           |

\* $p < .05$

**Supplemental Figure S1.** Power Spectral Density plots for acute MEM 10 mg (a) and 20 mg (b) conditions.



**Supplemental Figure S2.** Topographical distribution of spectral slopes and MEM effects. Left panel shows “raw” aperiodic slope values for PBO and MEM 20 mg conditions. SZ patients have a similar, but more broadly distributed pattern of aperiodic slopes elevations during PBO condition, which are “normalized” by MEM 20 mg relative to NCS. Right side of panel show T-score maps of PBO vs. MEM 20 mg for both SZ and NCS, separately. Drug effects are more distributed and extend beyond fronto-central electrodes in both groups, reflecting aperiodic slope elevations by MEM 20 mg in NCS and slope reductions in SZ.
